# Supplementary material for: Regional Variation in Parasite Species Richness and Abundance in the Introduced Range of the Invasive Lionfish, Pterois volitans
Source: PLOS journal article supplement (doi:10.1371/journal.pone.0131075), 2015-06-22
Supplement: S1 (10.1371/journal.pone.0131075.s001) [file journal.pone.0131075.s001]

**S1 Table. Summary of collection effort for parasitological comparison between native hosts and *Pterois volitans*.** Species labeled 'Native' are native to the Caribbean, while *P. volitans* was introduced from the Indo-Pacific.

| Host species                   | Native/Introduced | Cristobal | Hospital Point | Portobelo |
|--------------------------------|-------------------|-----------|----------------|-----------|
| <i>Pterois volitans</i>        | Introduced        | 19        | 17             | 21        |
| <i>Cephalopholis cruentata</i> | Native            | 19        | 20             | 19        |
| <i>Synodus intermedius</i>     | Native            | 14        | 0              | 0         |
